# Supplementary material
Source: MDPI journal article supplement (https://www.mdpi.com/2227-7390/8/12/2252)
Supplement: s1 [file s1]

## Supplementary Material to

# Realistic choice of annual matrices contracts the range of $\lambda_S$ estimates

Dmitrii O. Logofet <sup>1,\*</sup>, Leonid L. Golubyatnikov <sup>1</sup> and Nina G. Ulanova <sup>2</sup>

<sup>1</sup> Laboratory of Mathematical Ecology, A.M. Obukhov Institute of Atmospheric Physics, Russian Academy of Sciences, Moscow 119 017, Russia; [danilal@postman.ru](mailto:danilal@postman.ru), [golub@ifaran.ru](mailto:golub@ifaran.ru)

<sup>2</sup> Biological Department, Moscow State University, Moscow, 119234, Russia; [nulanova@mail.ru](mailto:nulanova@mail.ru)

\* Correspondence: [danilal@postman.ru](mailto:danilal@postman.ru)

The study allows us to conclude that the  $\lambda_1(t)$  variable correlates positively with the minimum air temperatures in May–June in the alpine heath; this turned out to be the only significant predictor in the models with one factor included. The best multiple regression model explains 99% of the variance and includes three factors: minimum air temperatures in May–June, precipitation from November to May, and maximum 10cm-depth soil temperatures in May–June (Table S1).

**Table S1.** Results of multiple regression models

| Model                                       | n | df | R <sup>2</sup> | p                     | Factors                                   | B                        | StE_B                    | p <sub>F</sub>                 |
|---------------------------------------------|---|----|----------------|-----------------------|-------------------------------------------|--------------------------|--------------------------|--------------------------------|
| <b>Teberda State Meteorological Station</b> |   |    |                |                       |                                           |                          |                          |                                |
| Pr 11-05                                    | 9 | 7  | 0.428          | 0.056 <sup>n.s.</sup> | Pr 11-05                                  | -0.002                   | 0.001                    | 0.056 <sup>n.s.</sup>          |
| Pr 11-05 + Mean T 05                        | 9 | 6  | 0.600          | 0.064 <sup>n.s.</sup> | Pr 11-05<br>Mean T 05                     | -0.003<br>0.150          | 0.001<br>0.093           | 0.028<br>0.160 <sup>n.s.</sup> |
| <b>Alpine heaths</b>                        |   |    |                |                       |                                           |                          |                          |                                |
| Min T 05-06                                 | 9 | 5  | 0.499          | 0.033                 | Min T 05-06                               | 0.154                    | 0.058                    | 0.033                          |
| Min T 05-06 + Pr 11-05 + Max TS10 05-06     | 7 | 3  | 0.993          | 0.001                 | Min T 05-06<br>Pr 11-05<br>MaxTS 10 05-06 | 0.190<br>-0.003<br>0.030 | 0.013<br>0.0001<br>0.003 | < 0.001<br>< 0.00<br>0.003     |
| Min T 05-06 + Pr 11-05                      | 8 | 5  | 0.859          | 0.007                 | Min T 05-06<br>Pr 11-05                   | 0.133<br>-0.002          | 0.037<br>0.000           | 0.015<br>0.017                 |

**Notations:** n, the number of observations; df, degrees of freedom; R<sup>2</sup>, the coefficient of determination; p, the significance level for the entire model; B, the regression coefficient; StE\_B, the error of the regression coefficient; p<sub>F</sub>, significance levels for factors;

Mean T 05, minimum air temperatures in May–June in the alpine heath;

Min T 05-06, minimum air temperatures in May–June;

Pr 11-05, precipitation from November to May, and

Max TS10 05-06, maximum 10cm-depth soil temperatures in May–June.
